# Supplementary material for: Effects of Hypoxia Exposure on Hepatic Cytochrome P450 1A (CYP1A) Expression in Atlantic Croaker: Molecular Mechanisms of CYP1A Down-Regulation
Source: PubMed Central journal article supplement (PMC3397942; doi:10.1371/journal.pone.0040825), 2012-07-16
Supplement: pone.0040825.s001.pdf [file pone.0040825.s001.pdf]

TCAAGAGAGTAAACTCGGACAATAACTTTCCACTTCCACAACGATATTTTCTTTACTGTTACTATTTGCTTTCTGTGTTTACTAC 87  
 AAAGTGCCTGTGGAACCGCAACATTGTTCCCTATTCAACCACTCGACTAAGGTTGCGCCGAGCCAGAAAAAAGGAGTTGTCATC 174  
ATGGTGCTAATGATACTGCCATTCAATGGATCAGTGTCCGATCTGAGAGTTTGGTGGCC 261  
 M V L M I L P F I G S V S V S E S L V A 20  
 ATAACAGTGTGTGTGTGGTCTACCTGGCTCTCAGGTGTTTTACACTGAAATTCCTGAGGGGCTTCGTCGACTGCCTGGACCAAAG 348  
 I T V L C V V Y L A L R C F H T E I P E G L R R L P G P K 49  
 CCCTTTCTCTCATTGGGAATGTGCTGGAAGTGGGCAGCAAACCCCTACTTGAGTCTCACTGCCATGAGCAAGCGTTATGGTGTATGTC 435  
 P F P L I G N V L E V G S K P Y L S L T A M S K R Y G D V 78  
 TTCCAGATCCAGGTTGGCATGCGTCCGGTCATTGTGTTGAGTGGCACTGACACAGTTCGACAGGCTCTCATCAAGCAAGGGGAAGAG 522  
 F Q I Q V G M R P V I V L S G T D T V R Q A L I K Q G E E 107  
 TTTGAGGCAGACCTGACCTGTACAGCTTCAGGTTCAACGATGGCAAGAGTCTGGCCTTCAGTACAGACCAGGCCGGCGTGTGG 609  
 F A G R P D L Y S F R F I N D G K S L A F S T D Q A G V W 136  
 CGTGCTCGCAGGAAGCTGGCCTACAGTGCCTGCGCTCTTCTCCAGCTGGAAGGCACAACCCAGAGTACTCCTGCATGCTGGAA 696  
 R A R R K L A Y S A L R S F S S L E G T T P E Y S C M L E 165  
 GAACACATTTGCAAAGAGGGAGAATATCTGATCAAACAGCTCAACAATGTCATGAAGGCTGACGGCAGCTTCGACCCCTTCCGACAC 783  
 E H I C K E G E Y L I K Q L N N V M K A D G S F D P F R H 194  
 ATTTGTTGCTCCGTTGCCAATGTGATCTGTGGAATGTGCTTCGGCCGACGCTATGACCAATGACCAGGAGCTTCTCAGTCTGGTG 870  
 I V V S V A A T T C V I C G M C F G R R Y D H N D Q E L L S L V 223  
 AACCTCAGTACGAAATTCGGTTCAGGTGGGCGAGCGTAACCTGCAGACTTCATCCCTATTCTCCAATACCTGCCAGCTCAACA 957  
 N L S D E F G Q V V G S G N P A D F I P I L Q Y L P S S T 252  
 ATGAAGACTTTTCATGGACATCAATGTCCGCTTCAACACATTTGTGCAAAAGATCGTCACTGAGCACTATGCCAATAAACAAGGAC 1044  
 M K T F M D I N V R F N T F V Q K I V S E H Y A N Y N K D 281  
 AACATTCGTGACATCACTGATTCCTCATGATCACTGTGAGGACAGAAAGCTGGATGAGAACTCCAATGTCCAGATGTCAGATGAG 1131  
 N I R D I T D S L I D H C E D R K L D E N S N V Q M S D E 310  
 AAGGTTGTAGGCATCGTCAATGACCTGTTTCGGAGCTGGTTTTGACACCATCTCCACTGCCCTGTCTTGGTCAAGTATGACTTGGTG 1218  
 K V V G I V N D L F G A G F D T I S T A L S W S V M Y L V 339  
 GCTCACCCAGAGATGCAGAAAGGCTTTATCAAGAAGTGAAGGACACAGTGGGTCTGGATCGCAGTCTCGTCTCTGACAGACC 1305  
 A H P E M Q E R L Y Q E L K D T V G L D R S P R L S D R P 368  
 AGCTTACCCTTCTGGATGCTTTCATCTGGAGATCTTTCGCCACTCTTCATTCCTGCCCTTACCATCCCTCACTGCACATCAAAA 1392  
 S L P F L D A F I L E I F R H S S F L P F T I P H C T S K 397  
 GACACATCGCTAAATGGATACTTTCATCCCAAAGACACCTGTGTCTTCATCAATCAGTGGCAGATCAACCATGATCCAGAGATTTGG 1499  
 D T S L N G Y F I P K D T C V F I N Q W Q I N H D P E I W 426  
 AAAGATCCATCTTCTTCAACCCAGATCGCTTCTGAGTGTGATGGCACTGAGGTCAACAAGATGGAAGGGGAGAAGATATCAATA 1566  
 K D P S S F N P D R F L S A D G T E V N K M E G E K I S I 455  
 TTTGGCATGGGGAAGCGCCGCTGCATCGCGAGGTCATTGCACGAAATGAAGTCTACCTCTTCTTGGCAATCATTTGCCAGAAGCTG 1653  
 F G M G K R R C I G E V I A R N E V Y L F L A I I V Q K L 484  
 CAATTCATGCGATGCCTGGAAAGCCACTGGACATGACACAGAGTACGGTCTCACAATGAAGCACAAACGTTGCCACCTGAGAGCC 1740  
 Q F H A M P G K P L D M T P E Y G L T M K H K R C H L R A 513  
 ACAATGCGAGTGAGAAATGAGCAGTAAAGCTATTTCAGAATGTACAATGTATGACTCACTAAGTCGTATAAGTTGACTCTAACAATGC 1827  
 T M R V R N E Q 521  
 ATGGGTCACCTTCAAGTCAAGAGTAAGTGAACAAGCATCTTTCTCAGAATGTAAGGCACCGAATGCCTAATTTGATTACAGGCTT 1914  
 ACTGGCATTGAAGCAAATCAATGAATGTTGCTTGTGCTGAGATTGTCAGAGATGACTATGTTTGTGTGAACATATCCCTGTCATGTTT 2001  
 TTGGTTCTCTGTGAGCTCTTCTGACATGATTGGTGTCTCTCAGTGAAGTATAGGAGAGATACTTGGTTCTCCTGAGTTGTGTAGT 2088  
 AAATAAATGTTCCCATTAAGAAGTTATAAATGCTCAGAGATTAATACCATGTTCAACTTTGGGGCAAGCAGTATGTTTTACT 2175  
 GGATGTTTTTCTTCTGTGACACAGGACTCAGAACTGAACAGCTAATACCTTTTGATAACCATTACACTTGTAAAGCTAAATATTTTAA 2262  
 TTCCATAATATAATGTGGATGTAAGACACTGAAGCTATATTTGTATCCCAAATGTGATTTCTGCTGTATATCAAAATCTTTGTATTT 2349  
 TATAAAGCCATTTTCATGTGCCTAGCGTTTGTATATCTGAGGTGAAATAGTTTAGCTGTTTATTACATGGAATATAAACCCACG 2436  
 AAAAGACTCCAGTGAGTTTTTGAATATATTGGAAGGCTAAACAATTTGTATTCTATATATAACGTATAAATGATTGTATAACA 2523  
 TGTATGGGCGTGTGATTGGAGCATCCTTTAATCAGCCACACAAATAAAATAAAATATGTTGTAAAAAATAAAAAAAAAAAAAAAAAA 2608

**Figure S1. Nucleotide and deduced amino acid (below the former) sequences of Atlantic croaker cytochrome P450 1A gene.** The start codon, heme-binding cysteine codon (position 463), stop codon (TAA), ATTTA (AUUUA) pentanucleotide sequences, TATA box, and putative poly-adenylation signal (AAAATAAAA) are all underlined and boldfaced. GenBank accession number JQ622220.
