# Supplementary material for: Effects of Hypoxia Exposure on Hepatic Cytochrome P450 1A (CYP1A) Expression in Atlantic Croaker: Molecular Mechanisms of CYP1A Down-Regulation
Source: PubMed Central journal article supplement (PMC3397942; doi:10.1371/journal.pone.0040825), 2012-07-16
Supplement: pone.0040825.s004.pdf [file pone.0040825.s004.pdf]

|                                                               |     |
|---------------------------------------------------------------|-----|
| GGAATGCAACGTGAGCGAGATGTGGGGCCACAAGATGCCAGGGGACTGGACTTGAA      | 58  |
| E C <u>N V S</u> E M W G H K M P R G L D L E                  | 19  |
| GTTACCCATCATCCACACACAATGAAGCATGTGGTCAACCTCATCATTGCCATTGAGAGG  | 118 |
| V T H H P H T M K H V V N L I I A I E R                       | 39  |
| TTAAAGGGCAGAGGGTCAGACTTACTGCTGAATGCCACCGAGTTCAGAGATGAAAATTG   | 178 |
| L K G R G S D L L L N A T E F R D E N L                       | 59  |
| CTCAACTTCGTGCTGGAGAACATAGTGAAGAGCGAATTGTGTTCGGGTGTAATGCAGCT   | 238 |
| L N F V L E N I V E E R I V F G C N A A                       | 79  |
| GCACCAGTTCAGTACACAAAGACGGAGGATTACCAGTGCAGCGTGACCGACAGTGAGAAG  | 298 |
| A P V Q Y T K T E D Y Q C S V T D S E K                       | 99  |
| AGGAGCTTAGTTCTGGTCCGAAACAGCATGGAACCTCCATGCTGTGATGCTGCAGGGAGGC | 358 |
| R S L V L V R N S M E L H A V M L Q G G                       | 119 |
| GCTGAGAATCGCAAAGTTCACCTGGAACATGGCGACCTACGTACACCCTGCACCCAGTGCG | 418 |
| A E N R K V H L N M A T Y V H P A P S A                       | 139 |
| GAGGCCAGACTGTGGCTCTGGGCATCAAGGGCACAAATTTCTACCTCTCTTGCCATAAG   | 478 |
| E A Q T V A L G I K G T N F Y L S C H K                       | 159 |
| GATGGGAACAACAAGCCATCCTTGACCTGGAGACAGTGGAAAATTCAACCAACCTGGCA   | 538 |
| D G N N K P S L H L E T V E N S T N L A                       | 179 |
| AGTATCAGCTCGGACAGCGAGATGGTTCGATTTCTGTTCTACAAACAAGACACTGGGCTG  | 598 |
| S I S S D S E M V R F L F Y K Q D T G L                       | 199 |
| AACCTCAGTACCCTTGTGTCTGTCCCCTACAACGACTGGTACAT                  | 642 |
| N L S T L V S V P Y N D W Y                                   | 213 |

**Figure S4. Nucleotide and deduced amino acid (below the former) sequences of Atlantic croaker interleukin-1 $\beta$  cDNA.** Putative *N*-glycosylation site is underlined. GenBank accession number JQ622219.
